# Supplementary material for: In Vitro Evaluation of Antioxidant Potential of the Invasive Seagrass Halophila stipulacea
Source: PubMed Central journal article supplement (PMC7830009; doi:10.3390/md19010037), 2021-01-16
Supplement: marinedrugs-19-00037-s001.pdf [file marinedrugs-19-00037-s001.pdf]

## Supplementary material

# In Vitro Evaluation of Antioxidant Potential of the Invasive Seagrass *Halophila stipulacea*

**Clementina Sansone <sup>1,\*</sup>, Christian Galasso <sup>1</sup>, Marco Lo Martire <sup>2</sup>, Tomás Vega Fernández <sup>1</sup>, Luigi Musco <sup>1</sup>, Antonio Dell'Anno <sup>2</sup>, Antonino Bruno <sup>3</sup>, Douglas M. Noonan <sup>4,5</sup>, Adriana Albini <sup>5</sup> and Christophe Brunet <sup>1</sup>**

<sup>1</sup> Stazione Zoologica Anton Dohrn, Istituto Nazionale di Biologia, Ecologia e Biotecnologie Marine, Villa Comunale, 80121 Napoli, Italy; christian.galasso@szn.it (C.G.); tomas.vegafernandez@szn.it (T.V.F.); luigi.musco@szn.it (L.M.); christophe.brunet@szn.it (C.B.)

<sup>2</sup> Department of Life and Environmental Sciences, Università Politecnica delle Marche, Via Brecce Bianche, 60131 Ancona, Italy; m.lomartire@univpm.it (M.L.M.); a.dellanno@staff.univpm.it (A.D.)

<sup>3</sup> Unit of Immunology, IRCCS MultiMedica, 20138 Milan, Italy; antonino.bruno@multimedica.it (A.B.);

<sup>4</sup> Department of Biotechnology and Life Sciences, University of Insubria, 211000 Varese, Italy; douglas.noonan@uninsubria.it

<sup>5</sup> Laboratory of Vascular Biology and Angiogenesis, IRCCS MultiMedica, 20138 Milan, Italy; adriana.albini@multimedica.it (A.A.)

\* Correspondence: clementina.sansone@szn.it; Tel: +39-0815833262

## Supplementary material

**Table 1.** List of the 84 oxidative stress-related genes of the WI-38 cell line analyzed in our study (from: RT<sup>2</sup> Profiler™ PCR Array Human Oxidative Stress Plus (Product no. 330231; Cat. No. PAHS-065Y)).

| GENE SUPERFAMILY                   | GENE SUBFAMILY                                                                                                    | GENES ANALYSED                                                                                                                                                                                                                                                                                                                                      |
|------------------------------------|-------------------------------------------------------------------------------------------------------------------|-----------------------------------------------------------------------------------------------------------------------------------------------------------------------------------------------------------------------------------------------------------------------------------------------------------------------------------------------------|
| Antioxidants                       | Glutathione Peroxidases                                                                                           | GPX1. GPX2. GPX3. GPX4. GPX5. GSTP1. GSTZ1.                                                                                                                                                                                                                                                                                                         |
|                                    | Peroxiredoxins                                                                                                    | PRDX1. PRDX2. PRDX3. PRDX4. PRDX5. PRDX6 (AOP2).                                                                                                                                                                                                                                                                                                    |
|                                    | Other Peroxidases                                                                                                 | CAT. CYBB. CYGB. DUOX1. DUOX2. EPX. LPO. MPO. PTGS1 (COX1). PTGS2 (COX2). TPO. TTN.                                                                                                                                                                                                                                                                 |
|                                    | Other Antioxidants                                                                                                | ALB. APOE. GSR. MT3. VIMP. SOD1. SOD3. SRXN1. TXNRD1. TXNRD2.                                                                                                                                                                                                                                                                                       |
| Reactive Oxygen Species Metabolism | Superoxide Dismutases                                                                                             | SOD1. SOD2. SOD3.                                                                                                                                                                                                                                                                                                                                   |
|                                    | Other Superoxide Metabolism Genes                                                                                 | ALOX12. CCS. DUOX1. DUOX2. MT3. NCF1. NCF2. NOS2 (INOS). NOX4. NOX5. UCP2.                                                                                                                                                                                                                                                                          |
|                                    | Other Reactive Oxygen Species Metabolism Genes                                                                    | AOX1. BNIP3. EPHX2. MPV17. SFTPD.                                                                                                                                                                                                                                                                                                                   |
|                                    | Oxidative Stress Responsive Genes                                                                                 | APOE. ATOX1. CAT. CCL5 (RANTES). CYGB. DHCR24. DUOX1. DUOX2. DUSP1 (PTPN16). EPX. FOXM1. FTH1. GCLC. GCLM. GPX1. GPX2. GPX3. GPX4. GPX5. GSR. GSS. HMOX1. HSPA1A (HSP70-1A). KRT1. LPO. MBL2. MPO. MSRA. NQO1. NUDT1. PDLIM1. PRDX2. PRDX5. PRDX6 (AOP2). PRNP. RNF7. VIMP. SEPP1. SIRT2. SOD1. SOD2. SQSTM1. SRXN1. TPO. TTN. TXN. TXNRD1. TXNRD2. |
| Oxygen Transporters                | CYGB. MB.                                                                                                         |                                                                                                                                                                                                                                                                                                                                                     |
| Pathway Activity Signature Genes   | AKR1C2. BAG2. FHL2. GCLM. GLA. HMOX1. HSP90AA1. LHPP. NCOA7. NQO1. PTGR1. SLC7A11. SPINK1. TRAPPC6A. TXN. TXNRD1. |                                                                                                                                                                                                                                                                                                                                                     |

## Supplementary material

**Table S2:** Oxidative stress-related genes of the WI-38 cell line **upregulated** (fold regulation > 2; in red) or **downregulated** (fold regulation < - 2; in blue) during treatments with H<sub>2</sub>O<sub>2</sub>. old leaf extract alone. before and after hydrogen peroxide injury.

| <i>GENE</i>   | Description                           | H <sub>2</sub> O <sub>2</sub><br>(10 mM) | Extract<br>(10 µgml <sup>-1</sup> ) | Extract added<br>before H <sub>2</sub> O <sub>2</sub> | Extract added after<br>H <sub>2</sub> O <sub>2</sub> |
|---------------|---------------------------------------|------------------------------------------|-------------------------------------|-------------------------------------------------------|------------------------------------------------------|
| <i>ALB</i>    | Albumin                               | 15.4                                     | 13.2                                | 43.4                                                  | 27.5                                                 |
| <i>APOE</i>   | Apolipoprotein E                      | 4.2                                      | 3.6                                 | 2.5                                                   | -3.6                                                 |
| <i>CCL5</i>   | Chemokine (C-C motif) ligand 5        | 1.6                                      | 1.1                                 | 62.5                                                  | 9.7                                                  |
| <i>CYBB</i>   | Cytochrome b-245                      | -38.0                                    | 3.9                                 | -26.2                                                 | -18.5                                                |
| <i>DUOX1</i>  | Dual oxidase 1                        | -2.1                                     | -1.1                                | -1.7                                                  | -2.4                                                 |
| <i>DUOX2</i>  | Dual oxidase 2                        | -2.5                                     | -1.1                                | -3.5                                                  | -4.6                                                 |
| <i>EPHX2</i>  | Epoxide hydrolase 2, cytoplasmic      | 3.1                                      | -19.3                               | -9.3                                                  | -6.6                                                 |
| <i>EPX</i>    | Eosinophil peroxidase                 | 2.0                                      | -2.1                                | 1.5                                                   | 1.1                                                  |
| <i>GCLC</i>   | Glutamate-cysteine ligase             | 2.1                                      | -2.1                                | 1.5                                                   | 1.1                                                  |
| <i>GPX2</i>   | Glutathione peroxidase 2              | 1.5                                      | 1.5                                 | -1.3                                                  | -1.8                                                 |
| <i>GPX5</i>   | Glutathione peroxidase 5              | -1.7                                     | 1.1                                 | -1.3                                                  | -1.6                                                 |
| <i>GSR</i>    | Glutathione reductase                 | -5.7                                     | 1.1                                 | 2.3                                                   | 3.2                                                  |
| <i>HSPA1A</i> | Heat shock 70kDa protein 1A           | -1.9                                     | -3.8                                | 1.8                                                   | -1.2                                                 |
| <i>KRT1</i>   | Keratin 1                             | 1.2                                      | 1.1                                 | -1.1                                                  | 1.3                                                  |
| <i>LPO</i>    | Lactoperoxidase                       | 1.6                                      | 1.1                                 | 2.3                                                   | 3.2                                                  |
| <i>MB</i>     | Myoglobin                             | 1.6                                      | 1.1                                 | 2.3                                                   | 17.0                                                 |
| <i>MBL2</i>   | Mannose-binding lectin 2              | 1.6                                      | 1.1                                 | 2.3                                                   | 3.2                                                  |
| <i>MPO</i>    | Myeloperoxidase                       | 14.3                                     | 51.2                                | 2.3                                                   | 3.2                                                  |
| <i>MT3</i>    | Metallothionein 3                     | 8.7                                      | 37.0                                | 15.4                                                  | 2.0                                                  |
| <i>NOS2</i>   | Nitric oxide synthase 2               | 1.6                                      | 1.1                                 | 2.3                                                   | 3.2                                                  |
| <i>NOX5</i>   | NADPH oxidase domain 5                | -1.1                                     | -1.4                                | -12.7                                                 | 1.6                                                  |
| <i>PRDX3</i>  | Peroxiredoxin 5                       | 1.6                                      | 1.1                                 | 2.3                                                   | 3.2                                                  |
| <i>PTGS2</i>  | Prostaglandin-endoperoxide synthase 2 | -1.3                                     | 1.7                                 | -1.2                                                  | -1.5                                                 |
| <i>SEPP1</i>  | Selenoprotein P, plasma, 1            | -5.0                                     | -1.1                                | -1.4                                                  | -3.3                                                 |
| <i>SFTPD</i>  | Surfactant protein D                  | -1.4                                     | 2.8                                 | -3.1                                                  | -1.5                                                 |
| <i>SOD3</i>   | Superoxide dismutase 3                | -62.8                                    | -89.8                               | 4.7                                                   | -30.6                                                |

## Supplementary material

|                |                                                |     |      |      |      |
|----------------|------------------------------------------------|-----|------|------|------|
| <i>TPO</i>     | Thyroid peroxidase                             | 2.4 | 1.1  | 1.5  | 1.6  |
| <i>AKR1C2</i>  | Aldo-keto<br>reductase member<br>C2            | 1.6 | 1.1  | 2.3  | 16.7 |
| <i>SLC7A11</i> | Solute carrier<br>family 7 member<br>11        | 1.3 | -1.2 | -2.0 | 1.1  |
| <i>SPINK1</i>  | Serine peptidase<br>inhibitor. Kazal<br>type 1 | 1.4 | -1.0 | -1.4 | 1.0  |
| <i>TXNRD1</i>  | Thioredoxin<br>reductase 1                     | 1.6 | 1.1  | 2.3  | 3.2  |
